# Supplementary material for: J-aggregate formation in bis-(4-carboxyphenyl)porphyrins in water : pH and counterion dependence
Source: Royal Society of Chemistry journal article supplement (doi:10.1039/c0nj00201a), 2010-01-01
Supplement: c0nj00201a.pdf [file c0nj00201a.pdf]

## **J-aggregate formation in bis-(4-carboxyphenyl)porphyrins in water:pH and counterion dependence**

Vanda Vaz Serra, Suzana M. Andrade, Maria G. P. M. S. Neves,\* José A. S. Cavaleiro, Sílvia M. B. Costa\*

### **SUPPORTING INFORMATION**

#### *Synthesis of meso-carboxyphenylporphyrins MCPP, DiCPP-opp and DiCPP-adj.*

Porphyrins **MCPP**, **DiCPP-opp** and **DiCPP-adj** were obtained according to literature crossed Rothmund procedures (Rocha Gonsalves et al, *J. Heterocycles Chem.*, **1991**, 28, 635-640) by adding adequate amounts of the appropriate benzaldehydes (benzaldehyde and 4-carboxybenzaldehyde for **MCPP**, benzaldehyde and 4-carboxymethylbenzaldehyde for **DiCPP-opp** and **DiCPP-adj**) and pyrrole to a refluxing mixture of glacial acetic acid and nitrobenzene. After refluxing the reaction mixture for 1 hour and removal of solvents under reduced pressure, the porphyrinic rich crude material was taken into chloroform and directly chromatographed on a silica column. This procedure provided **MCPP** directly. The synthesis of **DiCPP-opp** and **DiCPP-adj**, require preparative TLC to separate the isomeric porphyrins 5,10-bis(4-carboxymethylphenyl)porphyrin and 5,15-bis(4-carboxyphenylmethyl)porphyrin. Further alkaline hydrolysis provided the **DiCPP-opp** and **DiCPP-adj** in essentially quantitative yields. All the porphyrins studied were fully characterized by NMR and mass spectrometry (MALDI) techniques.

*Additional optical and kinetic data of DiCPP-opp and DiCPP-adj.*

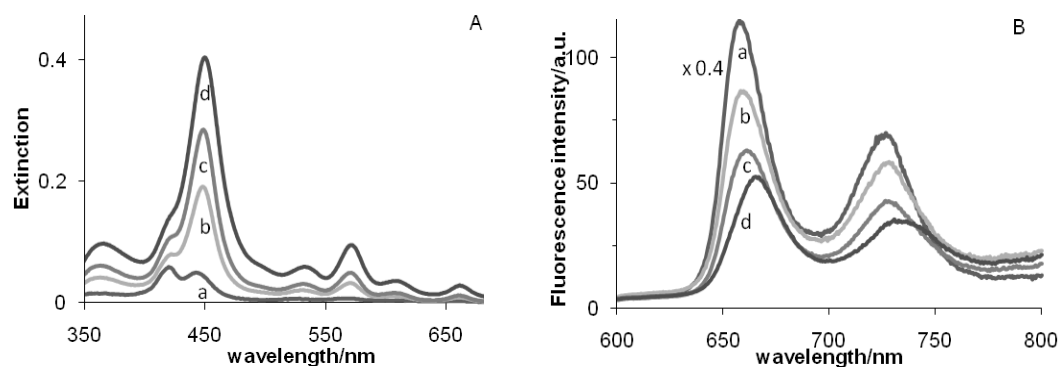

**Figure S1** – A) UV-Vis spectra and B) fluorescence emission spectra of different concentrations of **DiCPP-opp** in aqueous solution at pH=12: a) 1 μM; b) 2 μM; c) 3 μM; d) 5 μM;  $\lambda_{\text{ex}}=446\text{nm}$ .

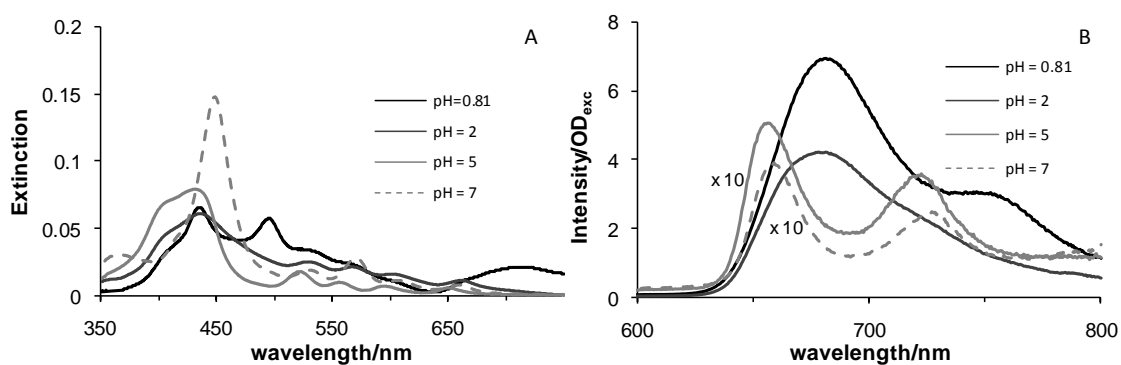

**Figure S2** - UV-Vis (A) and fluorescence emission (B) spectra of **DiCPP-opp** (5 μM) in aqueous solution at different pH ( $\lambda_{\text{exc}}=446\text{nm}$ ).

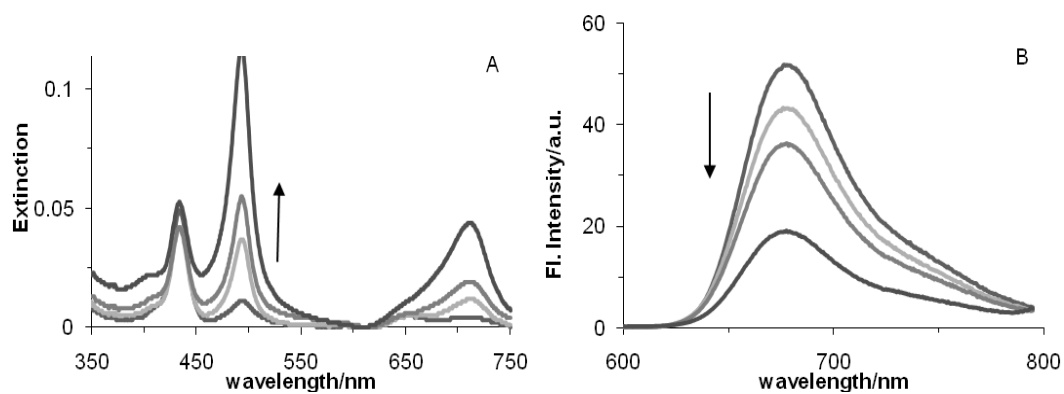

**Figure S3** – A) UV-Vis spectra and B) fluorescence emission spectra of **DiCPP-adj** in aqueous  $\text{HNO}_3$  (pH=0.8) obtained at different porphyrin concentrations (1 – 5  $\mu\text{M}$ );  $\lambda_{\text{exc}}=436$  nm.

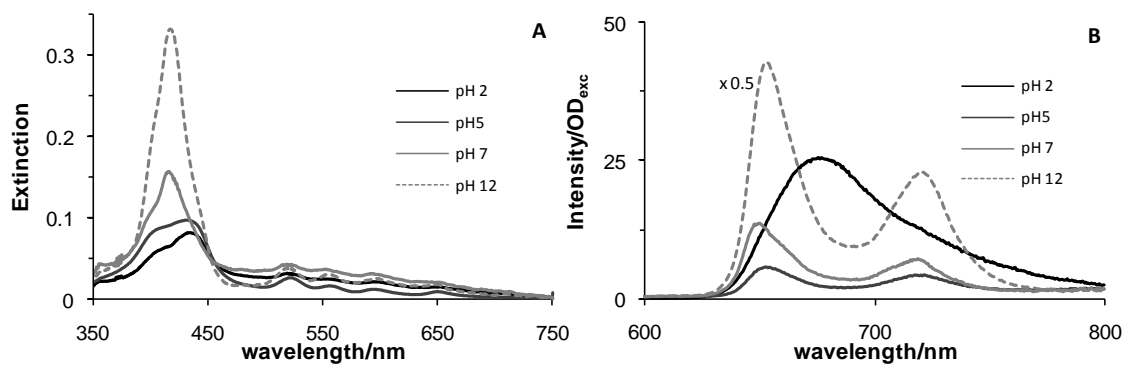

**Figure S4** - UV-Vis (A) and fluorescence emission (B) spectra of **DiCPP-adj** (5  $\mu\text{M}$ ) in aqueous solution at different pH ( $\lambda_{\text{exc}}=436$  nm).

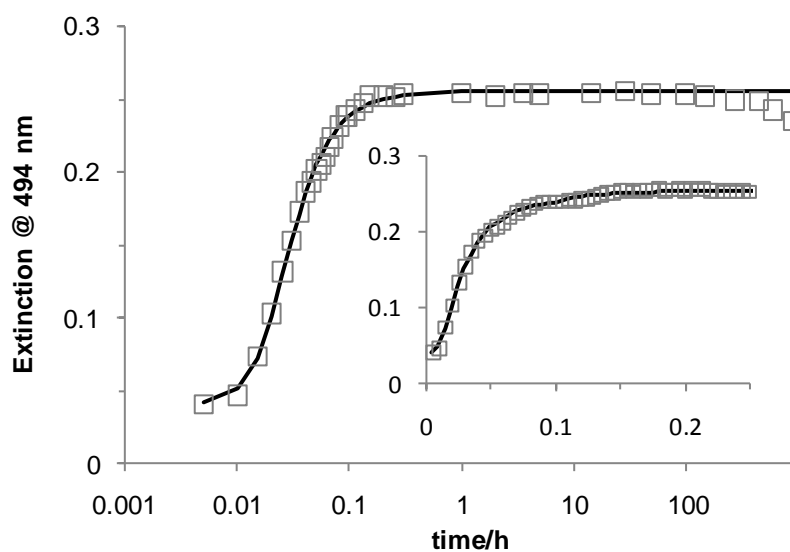

**Figure S5**– Kinetic profile for the aggregation of **DiCPP-adj** (5  $\mu\text{M}$ ) in aqueous solution at  $\text{pH}=0.8$  ( $\text{HNO}_3$ ): data (squares) and fit (line) obtained using eq. 6 of REF: R. F. Pasternack, C. Fleming, S. Herring, P. J. Collings, J. de Paula, G. De Castro and E. J. Gibbs, *Biophys. J.*, 2000, **79**, 550-560. Inset: Magnification of early times at linear scale.
